# Supplementary material
Source: publisher figshare collection journal article supplement (https://wiley.figshare.com/articles/dataset/_/3552558)
Supplement: Supplementary file 1 [file 1 › appendix-B.htm]

Ecological Archives E093-028-A2


### *Ecological Archives* E093-028-A2

### Daniel J. McGlinn and Allen H. Hurlbert. 2012. Scale dependence in species turnover reflects variance in species occupancy. *Ecology* 93:294–302.

Appendix B. Derivation of the occupancy distributions, matching/mismatching components, and average Jaccard turnover index for communities that minimize and maximize species turnover.

> View / download PDF.

---


[Back to E093-028]
